# Supplementary material for: Comparison of the U 37 K ′ , LDI, TEX 86 H , and RI-OH temperature proxies in sediments from the northern shelf of the South China Sea
Source: Copernicus journal article supplement (doi:10.5194/bg-17-4489-2020), 2020-09-11
Supplement: Supplementary file 1 [file bg-17-4489-2020-supplement.zip]

Archive with 3 entries (3 files):
- Supplementary table.xlsx
- bg-17-4489-2020-supplement-title-page.pdf
- Supplementary figure.pdf
