# Supplementary material for: Comparison of the U 37 K ′ , LDI, TEX 86 H , and RI-OH temperature proxies in sediments from the northern shelf of the South China Sea
Source: Copernicus journal article supplement (doi:10.5194/bg-17-4489-2020), 2020-09-11
Supplement: Supplementary file 1 [file bg-17-4489-2020-supplement.zip › bg-17-4489-2020-supplement-title-page.pdf]

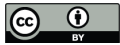

## *Supplement of*

# **Comparison of the $U_{37}^{K'}$ , LDI, $TEX_{86}^H$ , and RI-OH temperature proxies in sediments from the northern shelf of the South China Sea**

**Bingbing Wei et al.**

*Correspondence to:* Guodong Jia ([jiagd@tongji.edu.cn](mailto:jiagd@tongji.edu.cn)) and Gesine Mollenhauer ([gesine.mollenhauer@awi.de](mailto:gesine.mollenhauer@awi.de))

- [bg-17-4489-2020-supplement-title-page.pdf](#)
- [Supplementary figure.pdf](#)
- [Supplementary table.xlsx](#)

The copyright of individual parts of the supplement might differ from the CC BY 4.0 License.
