# Supplementary material for: Comparison of the U 37 K ′ , LDI, TEX 86 H , and RI-OH temperature proxies in sediments from the northern shelf of the South China Sea
Source: Copernicus journal article supplement (doi:10.5194/bg-17-4489-2020), 2020-09-11
Supplement: Supplementary file 1 [file bg-17-4489-2020-supplement.zip › Supplementary figure.pdf]

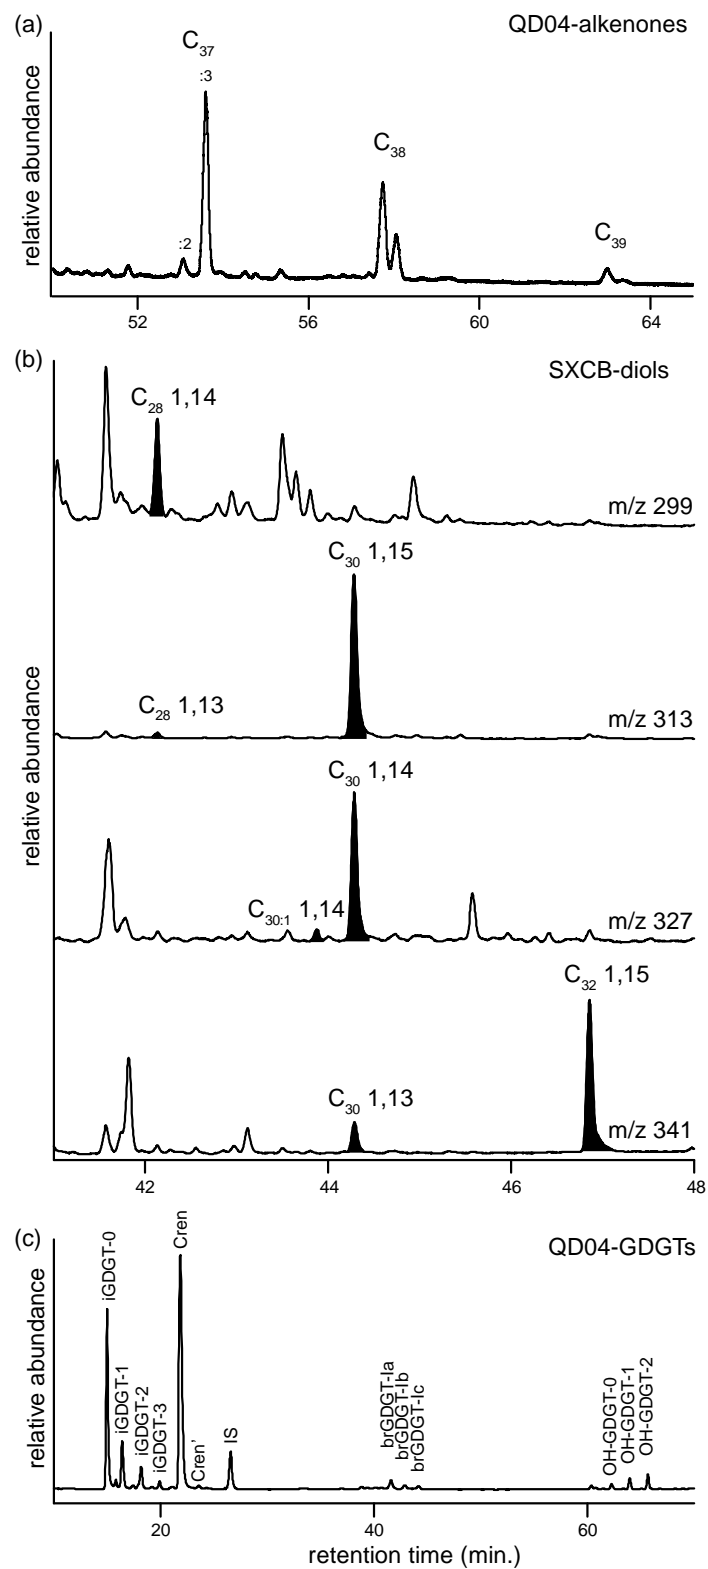

**Figure S1: Chromatograms showing distribution of (a)  $C_{37:2}$  and  $C_{37:3}$  alkenones by GC, (b)  $C_{28}$  and  $C_{30}$  1,13 diols,  $C_{28}$ ,  $C_{30}$  and  $C_{30:1}$  1,14 diols, and  $C_{30}$  and  $C_{32}$  1,15 diols by GC-MS, and (c) iGDGTs 0 to 4, crenarchaeol (Cren), the crenarchaeol isomer (Cren'), brGDGTs Ia to Ic, and OH-GDGTs 0 to 2 by HPLC-MS.**
