# Supplementary material for: Comparison of the U 37 K ′ , LDI, TEX 86 H , and RI-OH temperature proxies in sediments from the northern shelf of the South China Sea
Source: Copernicus journal article supplement (doi:10.5194/bg-17-4489-2020), 2020-09-11
Supplement: Supplementary file 1 [file Supplementary table.xlsx]

## Sheet: Table S1
Table S1: Sample information, as well as annual and seasonl temperatures from the WOA18 presented in this study.
Sites	Longitude (°E)	Latitude (°N)	WD (m)	Sampling time	Cruise	Sampling tool	Monthly SST (°C)												EAWM (Dec-Feb)			EASM (May-Sep)
							Jan	Feb	Mar	Apr	May	Jun	Jul	Aug	Sep	Oct	Nov	Dec	Mean	Min	Max	Mean	Min	Max
PRE-Y6	22.2922	113.764	6.5	2011-08-02	R/V Yuedongguan00589	grab sampler	20.691	20.9	21.104	22.485	26.404	27.214	28.729	29.473	28.806	27.113	24.724	24.336	21.9757	20.691	24.336	28.1252	26.404	29.473
PRE-Y11	22.1278	113.682	8	2011-08-02	R/V Yuedongguan00589	grab sampler	20.691	20.9	21.104	22.485	26.404	27.214	28.729	29.473	28.806	27.113	24.724	24.336	21.9757	20.691	24.336	28.1252	26.404	29.473
SXCB	21.5196	112.7	14	2013-07-17	R/V Xintenglonghao	Gravity box corer	22.654	20.553	21.897	24.201	26.809	27.755	29.45	28.84	28.726	27.405	25.632	23.947	22.3847	20.553	23.947	28.316	26.809	29.45
GLB	21.7199	113.03	15	2013-07-16	R/V Xintenglonghao	Gravity box corer	20.498	20.982	21.525	23.726	26.577	27.241	28.82	29.039	28.989	27.068	25.177	23.215	21.565	20.498	23.215	28.1332	26.577	29.039
PRE-A8	22.7102	113.682	17.5	2011-08-02	R/V Yuedongguan00589	grab sampler	20.691	20.9	21.104	22.485	26.404	27.214	28.729	29.473	28.806	27.113	24.724	24.336	21.9757	20.691	24.336	28.1252	26.404	29.473
QD00	21.1388	110.791	18	2012-08-09	R/V Dongfanghong II	Gravity box corer	20.057	18.733	15.774	21.625	25.785	27.687	28.683	28.293	29.023	27.2	25.506	21.659	20.1497	18.733	21.659	27.8942	25.785	29.023
LD-GSD	22.1315	113.805	21	2017-10-24	R/V SHIYAN3	grab sampler	20.691	20.9	21.104	22.485	26.404	27.214	28.729	29.473	28.806	27.113	24.724	24.336	21.9757	20.691	24.336	28.1252	26.404	29.473
WSB	21.99	113.722	21	2013-07-16	R/V Xintenglonghao	Gravity box corer	20.4555	21.2505	21.353	22.894	26.436	27.1825	28.6255	29.3505	28.765	27.072	25.066	24.054	21.92	20.4555	24.054	28.0719	26.436	29.3505
MMDB	21.2495	111.348	26	2013-07-17	R/V Xintenglonghao	Gravity box corer	20.965	19.575	18.4725	23.37	27.295	28.0375	28.894	28.375	28.9345	27.366	25.666	22.2325	20.9242	19.575	22.2325	28.3072	27.295	28.9345
E700	21.4702	112.543	26	2012-08-09	R/V Dongfanghong II	Gravity box corer	22.3605	20.4165	21.6245	24.2315	26.831	27.7605	29.465	28.779	28.8365	27.439	25.638	23.781	22.186	20.4165	23.781	28.3344	26.831	29.465
YJXB	21.4011	111.801	26.8	2013-07-17	R/V Xintenglonghao	Gravity box corer	22.654	20.553	21.897	24.201	26.809	27.755	29.45	28.84	28.726	27.405	25.632	23.947	22.3847	20.553	23.947	28.316	26.809	29.45
E600	21.3123	111.712	29	2012-08-09	R/V Dongfanghong II	Gravity box corer	21.137	19.52	19.001	23.139	27.133	27.74	29.172	28.413	29.059	27.5	25.589	22.51	21.0557	19.52	22.51	28.3034	27.133	29.172
A9	22.0012	114.001	35	2012-07-31	R/V Dongfanghong II	Gravity box corer	20.6465	21.1758	21.3828	22.624	26.3723	27.4165	28.76	29.4245	28.7338	27.1715	24.715	24.3927	22.0717	20.6465	24.3927	28.1414	26.3723	29.4245
E701	21.249	112.74	45	2012-08-09	R/V Dongfanghong II	Gravity box corer	22.2812	20.7958	22.1075	24.2473	26.8363	27.8915	29.3515	28.9042	28.781	27.389	25.681	24.0817	22.3863	20.7958	24.0817	28.3529	26.8363	29.3515
QD04	20.4218	111.109	47	2012-08-10	R/V Dongfanghong II	Gravity box corer	22.565	21.798	20.318	24.163	27.761	29.214	28.595	28.779	28.243	27.5	26.201	23.304	22.5557	21.798	23.304	28.5184	27.761	29.214
SW10	22.0592	115.011	58	2012-07-30	R/V Dongfanghong II	Gravity box corer	22.056	22.033	22.4193	23.2625	26.2182	27.8165	28.9728	29.5975	28.4295	27.372	24.586	24.7775	22.9555	22.033	24.7775	28.2069	26.2182	29.5975
LD-11	20.9307	114.536	86	2017-10-23	R/V SHIYAN3	grab sampler	22.969	23.029	23.536	24.19	26.697	28.624	28.849	29.145	28.781	27.69	25.935	24.384	23.4607	22.969	24.384	28.4192	26.697	29.145
A6	21.2733	114.731	88	2012-07-31	R/V Dongfanghong II	Gravity box corer	22.4078	22.7503	23.091	23.8263	26.4097	28.306	28.8418	29.276	28.686	27.6245	25.4537	24.3723	23.1767	22.4078	24.3723	28.3039	26.4097	29.276
LD-18	20.5654	113.798	88	2017-10-21	R/V SHIYAN3	grab sampler	22.496	22.645	23.624	24.62	27.108	28.687	28.971	29.002	28.876	27.513	26.257	24.725	23.2887	22.496	24.725	28.5288	27.108	29.002
QD11a	20.7	113.37	90	2012-08-10	R/V Dongfanghong II	Gravity box corer	22.451	21.8855	23.223	24.6325	27.058	28.4665	29.143	29.0355	28.854	27.4075	25.966	24.636	22.9908	21.8855	24.636	28.5114	27.058	29.143
QD41	20.1395	112.059	90	2012-08-10	R/V Dongfanghong II	Gravity box corer	23.11	21.664	22.57	24.931	27.347	29.19	29.378	29.145	28.849	27.538	26.115	24.152	22.9753	21.664	24.152	28.7818	27.347	29.378
E503	19.1978	112.287	186	2012-08-11	R/V Dongfanghong II	Gravity box corer	23.889	23.086	24.223	25.965	28.002	29.92	29.459	29.518	29.322	27.442	26.356	24.79	23.9217	23.086	24.79	29.2442	28.002	29.92
LD-21	19.6623	114.638	1307	2017-10-21	R/V SHIYAN3	grab sampler	23.42	23.863	25.011	26.142	28.189	29.789	29.24	29.152	29.025	28.002	26.66	25.276	24.1863	23.42	25.276	29.079	28.189	29.789

## Sheet: Table S2
Table S2: Content of TOC (%), UK'37 index as well as derived SSTs and annual residuals based on different calibrations.
Sites	TOC (%)	UK'37	±	UK'37-SST (°C)				Annual residual (°C)
				Müller et al., 1998	±	Bayspar-Tierney and Tingley., 2018	±	Müller et al., 1998	Bayspar-Tierney and Tingley., 2018
PRE-Y6	0.946622	0.905222	0.01	26.0976	1.5303	26.0032	2.20376	0.932733	0.838282
PRE-Y11	0.71559	0.907738	0.01	26.1739	1.5303	26.1146	2.19336	1.00897	0.949661
SXCB	0.840525	0.899295	0.01	25.918	1.5303	25.7541	2.15211	0.262295	0.0983058
GLB	0.781918	0.899007	0.01	25.9093	1.5303	25.7346	2.16551	0.671208	0.496539
PRE-A8	0.922777	0.812086	0.01	23.2753	1.5303	22.591	1.52322	-1.88958	-2.57387
QD00	0.394514	0.883125	0.01	25.428	1.5303	25.065	2.02059	1.25928	0.896266
LD-GSD	0.68146	0.911111	0.01	26.2761	1.5303	26.2531	2.24732	1.11118	1.08816
WSB	0.792854	0.905984	0.01	26.1207	1.5303	26.0479	2.20634	0.912021	0.83915
MMDB	0.81017	0.85056	0.01	24.4412	1.5303	23.8586	1.72306	-0.490702	-1.07329
E700	0.618134	0.925029	0.01	26.6978	1.5303	26.9092	2.36341	1.10092	1.31229
YJXB	0.725624	0.890907	0.01	25.6639	1.5303	25.4028	2.09095	0.0081118	-0.252967
E600	1.00397	0.932223	0.01	26.9159	1.5303	27.2466	2.42889	1.9231	2.2539
A9	0.7625	0.915499	0.01	26.4091	1.5303	26.4674	2.25958	1.17447	1.23279
E701	0.386007	0.928522	0.01	26.8037	1.5303	27.0671	2.36021	1.10805	1.37145
QD04	0.78567	0.913808	0.01	26.3578	1.5303	26.3916	2.31114	0.654396	0.68818
SW10	0.65658	0.933666	0.01	26.9596	1.5303	27.2833	2.41806	1.32406	1.64779
LD-11	0.268334	0.937185	0.01	27.0662	1.5303	27.4695	2.44139	0.913796	1.31704
A6	0.644076	0.939152	0.01	27.1258	1.5303	27.5762	2.45554	1.20538	1.65579
LD-18	0.231094	0.921264	0.01	26.5838	1.5303	26.7143	2.33933	0.373435	0.503921
QD11a	0.425159	0.918224	0.01	26.4916	1.5303	26.587	2.34582	0.428437	0.523754
QD41	0.344528	0.910385	0.01	26.2541	1.5303	26.235	2.21585	0.0883293	0.0692599
E503	0.04	0.937802	0.01	27.0849	1.5303	27.4882	2.45695	0.25392	0.657243
LD-21	0.924163	0.938246	0.01	27.0984	1.5303	27.5389	2.41533	0.117612	0.558133

## Sheet: Table S3
Table S3: LCD compositions, LDI index and derived SST, as well as annual and seasonl residuals.
Sites	Longitude (E)	Latitude (N)	C28 1,13 (%)	C30 1,13 (%)	C30 1,15 (%)	C32 1,15 (%) (river input index)	LDI	SST-LDI (°C)				Annual residual (°C)
								Rampen et al., 2012	±	de Bar et al., 2020	±
PRE-Y6	22.2922	113.764	9.34239	8.92641	40.3551	41.3761	0.688373	17.981	2	17.8515	3	-7.18392
PRE-Y11	22.1278	113.682	7.61165	6.20433	57.9261	28.2579	0.807422	21.5885	2	21.5145	3	-3.57638
SXCB	21.5196	112.7	2.69796	4.78026	69.895	22.6268	0.903349	24.4954	2	24.4661	3	-1.16034
GLB	21.7199	113.03	4.35075	6.33803	65.0749	24.2364	0.858919	23.1491	2	23.0991	3	-2.08901
PRE-A8	22.7102	113.682	5.34196	9.55436	18.7947	66.309	0.557855	14.0259	2	13.8355	3	-11.139
QD00	21.1388	110.791	3.93895	2.50649	87.9338	5.62074	0.931707	25.3548	2	25.3387	3	1.18601
WSB	21.99	113.722	1.98031	3.96777	81.1307	12.9212	0.931693	25.3543	2	25.3383	3	0.145632
MMDB	21.2495	111.348	5.73968	11.7059	30.9584	51.596	0.639584	16.5025	2	16.3503	3	-8.42938
E700	21.4702	112.543	2.49314	2.86742	83.7277	10.9118	0.939829	25.6009	2	25.5886	3	0.00395175
YJXB	21.4011	111.801	1.68444	3.18454	81.8536	13.2774	0.943856	25.7229	2	25.7125	3	0.0671472
E600	21.3123	111.712	2.44417	2.28676	90.9285	4.34061	0.950544	25.9256	2	25.9183	3	0.932825
A9	22.0012	114.001	3.04301	3.21747	88.1894	5.55014	0.933716	25.4156	2	25.4005	3	0.181044
E701	21.249	112.74	2.40553	2.42827	89.9895	5.1767	0.949023	25.8795	2	25.8715	3	0.183823
QD04	20.4218	111.109	2.66276	2.98662	87.6291	6.72153	0.939435	25.589	2	25.5765	3	-0.114464
SW10	22.0592	115.011	0.877068	1.64945	95.024	2.44945	0.9741	26.6394	2	26.6431	3	1.00391
LD-11	20.9307	114.536	1.49032	1.48825	93.8474	3.17406	0.969238	26.4921	2	26.4935	3	0.339639
A6	21.2733	114.731	1.30783	1.66689	93.1988	3.82648	0.969069	26.4869	2	26.4883	3	0.566508
LD-18	20.5654	113.798	0.789256	1.23345	95.7632	2.21412	0.979315	26.7974	2	26.8035	3	0.587089
QD11a	20.7	113.37	2.40755	2.60623	90.1177	4.86854	0.947296	25.8272	2	25.8183	3	-0.236048
QD41	20.1395	112.059	1.35688	1.4008	94.4669	2.77538	0.971636	26.5647	2	26.5673	3	0.398976
E503	19.1978	112.287	0.337687	1.24789	96.5598	1.85463	0.983845	26.9347	2	26.9429	3	0.103686
LD-21	19.6623	114.638	0.596301	1.17246	95.8357	2.39551	0.981878	26.8751	2	26.8824	3	-0.105652

## Sheet: Table S4
Table S4: Relative abundance of individual iGDGT, TEX86, TEX86H, BIT, MI and RI index, ratios of [2]/[3], [0]/[Cren], [0]/[Cren'] and [2]/[Cren], as well as proxy-derived SST and annual and winter residuals from different calibrations.
Sites	Longitude (E)	Latitude (N)	WD (m)	%GDGT-0	%GDGT-1	%GDGT-2	%GDGT-3	%Cren.	%Cren. iso	TEX86	±	TEX86H	±	RI	TEX86H-derived SSTs (°C)						BIT	MI	Ring index (RI)	[2]/[3]	[0]/[Cren]	[0]/[Cren']	[2]/[Cren]	Annual residual (°C)		EAWM residual (°C)
															Kim et al., 2010	±	Tierney and Tingley, 2014	±	Jia et al., 2017	±								Kim et al., 2012	Tierney and Tingley, 2014	Kim et al., 2012	Tierney and Tingley, 2014	Jia et al., 2017
PRE-Y6	22.2922	113.764	6.5	28.7813	6.41332	4.83795	1.48653	57.5721	0.908781	0.530042	0.01	-0.27569	0.01	2.54472	19.7428	2.59188	20.7214	1.88293	21.433	1.28942	0.0458318	0.178855	2.54472	3.25453	0.499917	31.6702	0.0840329	-5.4221	-4.44349	-2.23285	-1.25424	-0.542712
PRE-Y11	22.1278	113.682	8	26.0836	7.89185	6.91731	2.05184	55.9137	1.14166	0.561629	0.01	-0.250551	0.01	2.56104	21.4623	2.59188	21.6972	2.07818	22.619	1.28942	0.0608648	0.228109	2.56104	3.37127	0.466497	22.847	0.123714	-3.70258	-3.46771	-0.513334	-0.278465	0.643352
SXCB	21.5196	112.7	14	30.0414	7.72352	4.99358	1.64474	54.6865	0.910235	0.494272	0.01	-0.306034	0.01	2.45032	17.6673	2.59188	19.339	1.98174	20.0013	1.28942	0.0303239	0.205291	2.45032	3.03609	0.549338	33.004	0.0913129	-7.98849	-6.31675	-4.7174	-3.04567	-2.38336
GLB	21.7199	113.03	15	30.3017	7.60163	5.08587	1.59063	54.623	0.797196	0.495757	0.01	-0.304731	0.01	2.44226	17.7564	2.59188	19.1098	2.02364	20.0628	1.28942	0.0536007	0.204856	2.44226	3.1974	0.554742	38.0103	0.0931086	-7.4817	-6.12831	-3.80862	-2.45523	-1.50222
PRE-A8	22.7102	113.682	17.5	37.0071	5.52739	5.77135	1.63069	49.2813	0.782203	0.596883	0.01	-0.224111	0.01	2.22216	23.2708	2.59188	23.2352	1.90187	23.8665	1.28942	0.0814488	0.205252	2.22216	3.5392	0.750936	47.3114	0.11711	-1.89408	-1.92973	1.29517	1.25952	1.8908
QD00	21.1388	110.791	18	28.6533	6.72542	3.91747	1.308	58.2977	1.09816	0.484604	0.01	-0.314613	0.01	2.56068	17.0805	2.59188	18.9112	2.12933	19.5966	1.28942	0.0561003	0.167504	2.56068	2.995	0.491499	26.0922	0.0671977	-7.08825	-5.25758	-3.06917	-1.2385	-0.55309
LD-GSD	22.1315	113.805	21	25.4198	7.74224	5.77523	2.24073	56.6159	2.20609	0.569021	0.01	-0.244872	0.01	2.61303	21.8508	2.59188	22.4761	1.87808	22.8869	1.28942	0.487418	0.211292	2.61303	2.57738	0.448987	11.5226	0.102007	-3.31417	-2.6888	-0.124915	0.500445	0.91127
WSB	21.99	113.722	21	27.4467	7.62195	5.29704	1.92571	55.6608	2.04774	0.548795	0.01	-0.26059	0.01	2.54827	20.7757	2.59188	21.2063	1.84862	22.1454	1.28942	0.162787	0.204604	2.54827	2.75069	0.493106	13.4034	0.0951663	-4.43305	-4.00244	-1.14434	-0.713731	0.225373
MMDB	21.2495	111.348	26	31.2728	7.42615	4.20247	1.41756	54.6948	0.986237	0.470786	0.01	-0.327176	0.01	2.42808	16.2211	2.59188	18.2775	2.16103	19.0038	1.28942	0.279146	0.189826	2.42808	2.96458	0.57177	31.7092	0.076835	-8.71078	-6.65439	-4.70303	-2.64664	-1.92035
E700	21.4702	112.543	26	30.4236	7.8256	4.69347	1.38953	54.5418	1.12602	0.479495	0.01	-0.319216	0.01	2.44052	16.7656	2.59188	18.7363	2.04904	19.3794	1.28942	0.0749093	0.199904	2.44052	3.37773	0.557804	27.0187	0.0860528	-8.8313	-6.86064	-5.42038	-3.44972	-2.80662
YJXB	21.4011	111.801	26.8	27.5726	7.47183	5.22303	1.9838	55.7499	1.99883	0.551981	0.01	-0.258076	0.01	2.54864	20.9476	2.59188	21.9601	2.05843	22.264	1.28942	0.0615456	0.202667	2.54864	2.63284	0.494577	13.7943	0.0936868	-4.70813	-3.6956	-1.43705	-0.424519	-0.120679
E600	21.3123	111.712	29	28.4559	6.50216	4.00088	1.22574	58.8125	1.00279	0.489288	0.01	-0.310435	0.01	2.57442	17.3662	2.59188	18.9251	2.01985	19.7937	1.28942	0.0588275	0.163938	2.57442	3.26405	0.483841	28.3766	0.0680276	-7.62651	-6.06765	-3.68943	-2.13056	-1.262
A9	22.0012	114.001	35	31.0063	7.41641	4.41664	1.47894	54.5768	1.10487	0.485574	0.01	-0.313745	0.01	2.43413	17.1399	2.59188	18.824	2.15175	19.6375	1.28942	0.0305489	0.192945	2.43413	2.98636	0.568123	28.0634	0.0809253	-8.09474	-6.4106	-4.9318	-3.24766	-2.43414
E701	21.249	112.74	45	26.0848	7.0348	4.91993	1.64366	58.9068	1.40998	0.531275	0.01	-0.27468	0.01	2.63073	19.8119	2.59188	20.8351	2.0186	21.4806	1.28942	0.041071	0.183973	2.63073	2.99328	0.442816	18.5001	0.0835207	-5.88381	-4.86056	-2.57439	-1.55115	-0.905671
QD04	20.4218	111.109	47	29.5185	6.7596	4.03347	1.33679	57.2358	1.11581	0.489675	0.01	-0.310092	0.01	2.52244	17.3897	2.59188	18.8709	2.33283	19.8098	1.28942	0.100809	0.1721	2.52244	3.01728	0.515734	26.4548	0.0704711	-8.31373	-6.8325	-5.16598	-3.68475	-2.74582
SW10	22.0592	115.011	58	28.2336	9.23256	6.46042	2.2207	51.7113	2.14135	0.539639	0.01	-0.267897	0.01	2.44226	20.2759	2.59188	21.0028	2.02215	21.8006	1.28942	0.192623	0.249611	2.44226	2.90918	0.545986	13.185	0.124932	-5.35964	-4.63267	-2.67964	-1.95267	-1.15487
LD-11	20.9307	114.536	86	18.143	6.34066	5.11858	1.92861	65.8606	2.60853	0.603619	0.01	-0.219237	0.01	2.9624	23.6042	2.59188	23.9904	1.87285	24.0964	1.28942	0.147176	0.163552	2.9624	2.65403	0.275475	6.95526	0.0777183	-2.54825	-2.16202	0.143501	0.529727	0.635717
A6	21.2733	114.731	88	26.7889	9.04634	7.04227	2.28413	52.4159	2.42248	0.56498	0.01	-0.247967	0.01	2.49337	21.6391	2.59188	22.1494	1.72588	22.7409	1.28942	0.021661	0.250955	2.49337	3.08313	0.511082	11.0584	0.134354	-4.28138	-3.77101	-1.53769	-1.02732	-0.435832
LD-18	20.5654	113.798	88	23.6127	9.07674	7.83168	2.63589	53.8791	2.9639	0.596737	0.01	-0.224217	0.01	2.6002	23.2635	2.59188	23.5886	1.84693	23.8614	1.28942	0.0314441	0.255858	2.6002	2.97117	0.438252	7.96675	0.145357	-2.9468	-2.62172	-0.025131	0.299952	0.57276
QD11a	20.7	113.37	90	28.1169	7.80117	4.96922	1.6834	55.9329	1.49635	0.510903	0.01	-0.291662	0.01	2.52507	18.6503	2.59188	19.9862	2.2283	20.6794	1.28942	0.282059	0.201074	2.52507	2.9519	0.50269	18.7903	0.0888425	-7.41288	-6.07696	-4.3405	-3.00459	-2.31144
QD41	20.1395	112.059	90	23.5971	8.18817	6.77412	2.24109	56.5597	2.63988	0.587358	0.01	-0.231097	0.01	2.65258	22.7929	2.59188	23.1026	1.86953	23.5368	1.28942	0.245332	0.225166	2.65258	3.0227	0.417207	8.93871	0.11977	-3.37281	-3.06315	-0.182395	0.127271	0.561492
E503	19.1978	112.287	186	23.7097	7.61896	7.75122	2.13167	54.4553	4.33323	0.651068	0.01	-0.186374	0.01	2.6467	25.852	2.59188	25.476	1.83004	25.6469	1.28942	0.222885	0.229411	2.6467	3.63622	0.435397	5.4716	0.142341	-0.978963	-1.35499	1.93037	1.55435	1.72522
LD-21	19.6623	114.638	1307	29.9466	9.31004	10.6905	1.49254	43.1725	5.38786	0.653656	0.01	-0.184651	0.01	2.2941	25.9699	2.59188	25.9406	1.90255	25.7282	1.28942	0.0257386	0.306809	2.2941	7.16262	0.69365	5.55816	0.247622	-1.01085	-1.04017	1.78356	1.75425	1.54185

## Sheet: Table S5
Table S5: OH-GDGT compositions, relative OH-GDGT ratios, and RI-OH index, as well as RI-OH-derived SST and related residuals using diferent calibrations.
Sites	Longitude (E)	Latitude (N)	WD (m)	[OH-0] (%)	[OH-1] (%)	[OH-2] (%)	%[OHs]	RI-OH	±	Summer RI-OH-SST (°C)	±	EASM residual (°C)	±
PRE-Y6	22.2922	113.764	6.5	15.449	26.085	58.466	2.85857	1.69149	0.01	29.5875	0.91694	1.4623	0.91694
PRE-Y11	22.1278	113.682	8	13.2743	23.858	62.8677	3.44588	1.7249	0.01	30.1737	0.91694	2.04853	0.91694
SXCB	21.5196	112.7	14	18.9929	30.7977	50.2095	3.34906	1.61982	0.01	28.3301	0.91694	0.0140931	0.91694
GLB	21.7199	113.03	15	18.4448	30.6491	50.9061	3.49271	1.62419	0.01	28.4069	0.91694	0.27367	0.91694
PRE-A8	22.7102	113.682	17.5	15.4527	17.5223	67.025	2.50561	1.79275	0.01	31.3641	0.91694	3.23887	0.91694
QD00	21.1388	110.791	18	18.1484	32.0879	49.7638	3.90259	1.60798	0.01	28.1224	0.91694	0.228174	0.91694
MMDB	21.2495	111.348	26	19.7259	33.1707	47.1034	4.13023	1.58678	0.01	27.7506	0.91694	-0.556629	0.91694
E700	21.4702	112.543	26	18.7432	32.4153	48.8415	3.97542	1.60108	0.01	28.0013	0.91694	-0.333065	0.91694
E600	21.3123	111.712	29	20.8295	31.9169	47.2536	3.51137	1.59686	0.01	27.9273	0.91694	-0.376063	0.91694
A9	22.0012	114.001	35	17.9727	34.3514	47.6759	3.67638	1.58122	0.01	27.653	0.91694	-0.488421	0.91694
E701	21.249	112.74	45	14.3593	31.7223	53.9184	3.86348	1.62959	0.01	28.5016	0.91694	0.148661	0.91694
QD04	20.4218	111.109	47	18.889	34.7343	46.3766	4.09554	1.57177	0.01	27.4872	0.91694	-1.03124	0.91694
SW10	22.0592	115.011	58	15.9429	28.9593	55.0977	2.93631	1.65548	0.01	28.9558	0.91694	0.748891	0.91694
LD-11	20.9307	114.536	86	13.1486	23.1916	63.6599	1.69503	1.73297	0.01	30.3153	0.91694	1.89614	0.91694
A6	21.2733	114.731	88	16.683	29.0416	54.2754	2.64297	1.65143	0.01	28.8848	0.91694	0.58088	0.91694
LD-18	20.5654	113.798	88	13.0344	23.8384	63.1272	2.37468	1.72589	0.01	30.191	0.91694	1.6622	0.91694
QD11a	20.7	113.37	90	16.1721	32.9085	50.9194	3.26567	1.60743	0.01	28.1128	0.91694	-0.398622	0.91694
QD41	20.1395	112.059	90	15.1932	27.529	57.2778	2.24958	1.67539	0.01	29.3051	0.91694	0.523312	0.91694
E503	19.1978	112.287	186	15.8591	23.1659	60.9749	1.53031	1.72468	0.01	30.1698	0.91694	0.925567	0.91694
LD-21	19.6623	114.638	1307	38.613	22.2117	39.1753	1.51965	1.63817	0.01	28.6521	0.91694	-0.426908	0.91694
